# Supplementary material for: Frequency-Unspecific Effects of θ-tACS Related to a Visuospatial Working Memory Task
Source: PubMed Central journal article supplement (PMC5506205; doi:10.3389/fnhum.2017.00367), 2017-07-12
Supplement: Image_1.pdf [file Image_1.pdf]

## Supplementary Material

### Frequency-Unspecific Effects of $\theta$ -tACS Related to a Visuospatial Working Memory Task

Maria-Lisa Kleinert\*, Caroline Szymanski, and Viktor Müller\*

\* Correspondence:

Corresponding Author: Maria-Lisa Kleinert: kleinert@mpib-berlin.mpg.de

Viktor Müller: vmueller@mpib-berlin.mpg.de

#### 1 Supplementary Figures

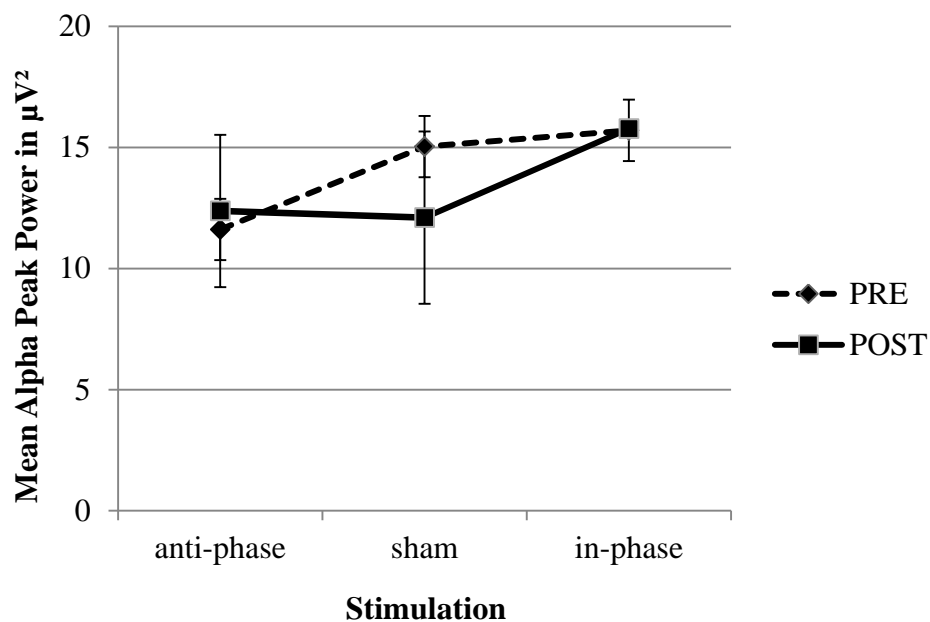

**Supplementary Figure 1.** Mean alpha peak power of resting EEG in the three stimulation conditions (anti-phase, sham and in-phase) before and after stimulation. Peak power (in  $\mu V^2$ ) was averaged across five electrodes within direct vicinity of the stimulation sites, i.e., Fz, F8, Pz, P8, and Oz. Standard error bars are displayed.
